# Supplementary material for: Multi-stimuli responsive fluorescence switching: the reversible piezochromism and protonation effect of a divinylanthracene derivative
Source: Royal Society of Chemistry journal article supplement (doi:10.1039/c3tc31553c), 2013-01-01
Supplement: c3tc31553c.pdf [file c3tc31553c.pdf]

## Multi-Stimuli-Responsive Fluorescence Switching of A

### Divinylanthracene Derivative: Piezochromism and Vapochromism

*Yujie Dong,<sup>a</sup> Jibo Zhang,<sup>a</sup> Xiao Tan,<sup>b</sup> Lijuan Wang,<sup>a</sup> Jinlong Chen,<sup>a</sup> Bao Li,<sup>a</sup> Ling Ye,<sup>a</sup> Bo Zou,<sup>b</sup> Bin Xu,<sup>\*a</sup> and Wenjing Tian<sup>\*a</sup>*

State Key Laboratory of Supramolecular Structure and Materials, Jilin University, Qianjin street No.2699, Changchun 130012, China.

wjtian@jlu.edu.cn (Wenjing Tian\*); Fax: +86431 85193421. Tel.: +86431 85166368.

xubin2211@gmail.com (Bin Xu\*); Fax: +86431 85193421. Tel.: +86431 85166476.

### Table of Contents

1. UV-vis absorption of unground and ground powders of BP4VA.
2. Normalized solid-state PL spectra of BP4VA crystal (C2) after application of pressure (GPa).
3. PXRD patterns of BP4VA powders treated by HCl vapor and then TEA vapor, as well as the simulated patterns obtained from the data of single crystal.
4. FT-IR absorption spectra (KBr pellets) of BP4VA.
5. The emission wavelength of the repeated conversion between ground (around 550 nm) and heated (around 520 nm) states (excited at 365 nm).
6. Crystal Data and Structure Refinements of Two Crystals.

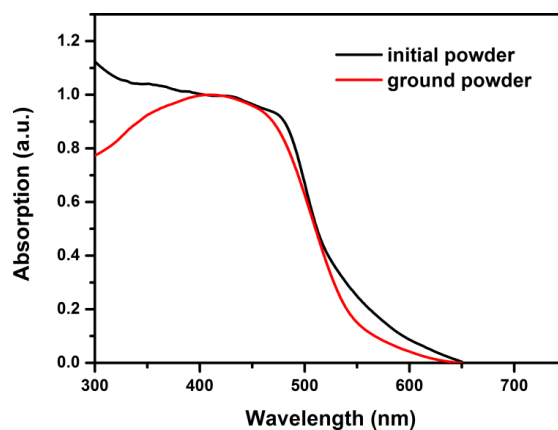

**FigureS1:** UV-vis absorption of unground and ground powders of BP4VA.

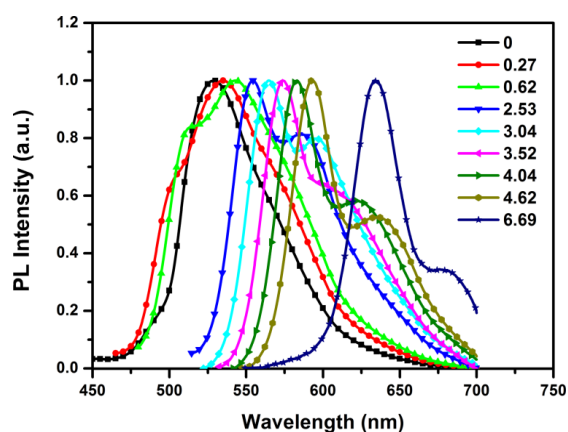

**Figure S2.** Normalized solid-state PL spectra of BP4VA crystal (C2) after application of pressure (GPa).

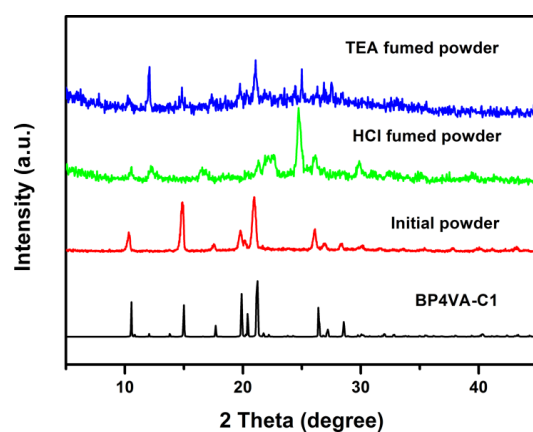

**Figure S3.** PXRD patterns of BP4VA powders treated by HCl vapor and then TEA vapor, as well as the simulated patterns obtained from the data of single crystal.

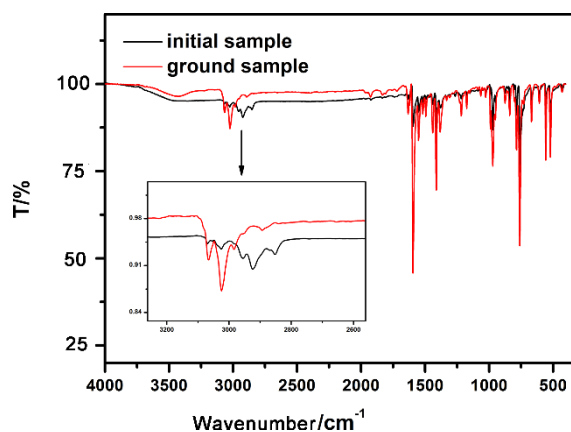

**Fig. S4** FT-IR absorption spectra (KBr pellets) of BP4VA.

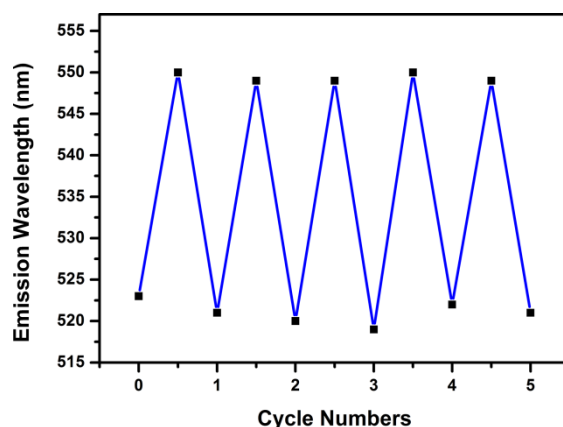

**Fig. S5** The emission wavelength of the repeated conversion between ground (around 550 nm) and heated (around 520 nm) states (excited at 365 nm).

**Table S1:** Crystal Data and Structure Refinements of Two Crystals

|                                                   | BP4VA-C1                                       | BP4VA-C2                                       |
|---------------------------------------------------|------------------------------------------------|------------------------------------------------|
| CCDC No.                                          | 943524                                         | 943525                                         |
| empirical formula                                 | C <sub>28</sub> H <sub>20</sub> N <sub>2</sub> | C <sub>28</sub> H <sub>20</sub> N <sub>2</sub> |
| formula wt                                        | 384.46                                         | 384.46                                         |
| <i>T</i> , K                                      | 293(2) K                                       | 293(2) K                                       |
| crystal system                                    | triclinic                                      | monoclinic                                     |
| space group                                       | P-1                                            | P2 <sub>1</sub> /c                             |
| <i>a</i> , Å                                      | 6.850(7)                                       | 7.5957(15)                                     |
| <i>b</i> , Å                                      | 9.230(12)                                      | 5.7108(11)                                     |
| <i>c</i> , Å                                      | 9.341(10)                                      | 22.899(5)                                      |
| $\alpha$ , deg                                    | 65.88(4)                                       | 90.00                                          |
| $\beta$ , deg                                     | 69.95(4)                                       | 95.95(3)                                       |
| $\gamma$ , deg                                    | 77.39(5)                                       | 90.00                                          |
| <i>V</i> , Å <sup>3</sup>                         | 504.2(10)                                      | 987.9(3)                                       |
| <i>Z</i>                                          | 1                                              | 2                                              |
| density, Mg/m <sup>3</sup>                        | 1.266                                          | 1.292                                          |
| <i>M</i> (Mo K $\alpha$ ), mm <sup>-1</sup>       | 0.074                                          | 0.076                                          |
| $\theta$ range, deg                               | 3.18 - 27.48                                   | 3.08 - 27.48                                   |
| no. of reflns collected                           | 4939                                           | 9226                                           |
| no. of unique reflns                              | 2274                                           | 2253                                           |
| <i>R</i> (int)                                    | 0.0219                                         | 0.0213                                         |
| GOF                                               | 1.077                                          | 1.081                                          |
| <i>R</i> 1 [ <i>I</i> > 2 $\sigma$ ( <i>I</i> )]  | 0.0463                                         | 0.0428                                         |
| <i>wR</i> 2 [ <i>I</i> > 2 $\sigma$ ( <i>I</i> )] | 0.1496                                         | 0.1269                                         |
| <i>R</i> 1 (all data)                             | 0.0726                                         | 0.0596                                         |
| <i>wR</i> 2 (all data)                            | 0.1889                                         | 0.1380                                         |
